# 1 Title page

2

3 Full title: A scoping review on the associations and potential pathways between malnutrition and  
4 measles

5 Short title: Malnutrition and measles

6

7 Isabelle CT Tran<sup>1,2\*</sup>, Christopher Gregory<sup>3</sup>, Patrick O'Connor<sup>4</sup>, Annette Imohe<sup>5</sup>, Lien Anh Ha Do<sup>6,7</sup>,  
8 Parminder S Suchdev<sup>8</sup>

9

10

11 <sup>1</sup> Early Childhood Nutrition Unit, UNICEF, New York, New York, USA

12 <sup>2</sup> Independent researcher

13 <sup>3</sup> Immunization Unit, UNICEF, New York, New York, USA

14 <sup>4</sup> Vaccine Preventable Disease and Immunization Flagship Programme, World Health Organization  
15 Regional Office for Europe, Copenhagen, Denmark

16 <sup>5</sup> Nutrition Section, Programme Group, UNICEF, New York, New York, USA

17 <sup>6</sup> Infection and Immunity Theme, New Vaccines group, Murdoch Children's Research Institute,  
18 Melbourne, Australia

19 <sup>7</sup> Department of Paediatrics, University of Melbourne, Melbourne, Australia

20 <sup>8</sup>Hubert Department of Global Health, Rollins School of Public Health, Emory University, Atlanta, GA, USA

21

22 \* Corresponding author

23 E-mail : [chau-thy.tran@mail.mcgill.ca](mailto:chau-thy.tran@mail.mcgill.ca) (ICTT)

## 24 Abstract

25 Amid a measles resurgence worldwide, many affected regions also find themselves in circumstances of  
26 conflict, humanitarian or political crises, climate extremes, ongoing pandemic challenges, income  
27 inequality and economic downturns. Those contextual factors have driven increases in worldwide  
28 undernourishment over the past year. The overlap and frequent occurrence of those socio-structural  
29 determinants in fragile geographies is worrying as a synergistic relationship between measles and  
30 malnutrition has been reported. A scoping review was conducted to map current evidence and identify  
31 research gaps on the association between malnutrition and measles.

32 Sixty-seven studies were retained following a search of multiple databases, snowballing and  
33 consultations with experts. Studies reported on a measure of association, a relationship, or potential  
34 mechanisms behind the link between malnutrition and measles.

35 Overall, there was evidence of a positive correlation between undernutrition and reported measles  
36 incidence and mortality. All studies reviewed found an association between vitamin A deficiency and  
37 increased likelihood of incident measles, measles-related complications and measles-related deaths.  
38 Available evidence also suggested that therapeutic vitamin A can significantly reduce the odds of  
39 measles-related mortality, and preventative vitamin A can reduce reported measles incidence. Little  
40 data shed light on potential pathways behind malnutrition and measles. Inconsistent variable definitions  
41 (i.e. malnutrition and measles cases) across studies precluded calculating a cumulative effect size, and  
42 findings may be impacted by uncontrolled confounding factors.

43 This scoping review reinforces the hypothesis of a synergistic relationship between measles and  
44 malnutrition and highlights the need for an integrated approach to the delivery of malnutrition  
45 interventions and measles prevention and control. In addition, further robust studies are needed to  
46 better define pathophysiological targets for interventions and allow for stronger inferences to policy

- 47 making. Future research should also consider using a standardized approach to defining malnutrition
- 48 and measles to ensure comparability of outcomes across studies.

## 49 Introduction:

50 Measles is one of the most contagious respiratory infections, spread from person-to-person via airborne  
51 transmission.(1) Malnourished children with weaker immune systems are particularly at risk of  
52 developing debilitating complications.(1) Following the introduction of widespread measles  
53 immunization campaigns, cases dropped 95% over a 35-year period, from 1980 to 2015. (1) From 2000  
54 to 2016, measles deaths dropped by 84%. (1) Despite this progress, global vaccination rates have been  
55 falling short of universal coverage targets. For example, while 95% coverage for two doses of measles  
56 immunization is required to achieve disease elimination, coverage has stagnated at around 10% below  
57 the recommended threshold for the first dose, and 25% for the second. (2, 3). From 2016 to 2019, there  
58 was a measles resurgence worldwide: incident cases rose by 556%. (3) In that same period of time,  
59 measles-related deaths surged nearly 50%. (3) In the recent years, past achievements have been lost  
60 largely due to a failure to vaccinate, driven by limited access to health services and/or vaccine hesitancy.  
61 (3) The 2020 global COVID-19 pandemic also had repercussions on immunization services. The latest  
62 World Health Organization (“WHO”) and United Nations International Children's Emergency Fund  
63 (“UNICEF”)’s estimates found that global coverage of the first dose for measles dropped 2%, from 86% in  
64 2019 to 84% in 2020, and coverage of the second dose for measles dropped 1%, from 71% in 2019 to  
65 70% in 2020. These decreases have led to an additional 3 million potentially unvaccinated children in  
66 2020 compared to 2019. (4)

67 The largest and most disruptive outbreaks in 2020-21 were across the African region, as well as in  
68 Afghanistan, Yemen and Pakistan. (5) Many of the affected countries are currently in a context of  
69 conflict or humanitarian emergency, with weakened public infrastructures, disruptions to immunization  
70 delivery and limited access to healthcare. Several of them are also being affected by climate extremes,  
71 income inequality and economic downturns. All those contextual drivers have led to an increase in

72 worldwide undernourishment over the past year. In 2020, Africa and Asia were home to more than 90%  
73 of the children with wasting and/or stunting. (6) UNICEF analyses estimate that, from 2020 to 2021,  
74 coverage of essential nutrition services, such as early detection and treatment of wasting, dropped by at  
75 least 10-24% in a fifth of countries which reported data. From July 2020 to July 2021, national coverage  
76 of vitamin A supplementation, a World Health Organization recommended intervention that is critical to  
77 maintain strong immune systems and improve a child's survivability, dropped in 24 countries.(7)

78 Though the impact of the pandemic on global malnutrition has not yet been fully assessed, initial  
79 projections suggest that the prevalence of moderate or severe wasting among children under 5 years  
80 old could increase by 14.3% due to COVID-19 repercussions.(8) This is equivalent to an additional 6.7  
81 million wasted children, with approximately 57.6% of them in Asia and 21.8% in Africa.(8) Current Russo-  
82 Ukrainian conflicts also have impacts on the global food supplies, further exacerbating global food  
83 insecurity and malnutrition.(9)

84 The coincidence of measles and undernutrition in fragile contexts is worrying as undernourished  
85 children are at higher risk of measles-related complications and deaths. (1) Measles has also often been  
86 reported as a potential compounding factor for malnutrition. The infection can cause severe diarrhea,  
87 contributing to a loss of nutrients and body fluids. (1) In addition, measles is commonly complicated by  
88 mouth ulcers and gastroenteritis. (10) This can cause discomfort with eating, decreased appetite and  
89 reduced dietary intake, and all of these changes are occurring on a backdrop of increased energy and  
90 nutrient requirements due to physiological changes caused by the illness. Potential complications also  
91 include erasure of pre-existing immune memory cells and immune suppression, which can last several  
92 weeks and up to 2-3 years following an acute measles episode.(11) Infected individuals are therefore  
93 more susceptible to secondary infections, compounding the risk of nutritional deficiency.(11) Finally,  
94 noma, a debilitating condition characterized by gangrenous ulcerations of the mouth and face, has been

95 associated with severe measles. (12) Noma cases have been described particularly among malnourished,  
96 young children living in extreme poverty and in countries with low measles vaccination rates. (12)

97 However, little is known about the causal mechanisms behind the potential association between  
98 measles and malnutrition. While malnutrition in all its forms may include undernutrition, hidden hunger  
99 (i.e. deficiencies of essential vitamins and minerals), and overweight/obesity, for the purpose of this  
100 review we focused on undernutrition and micronutrient deficiencies.(13) This paper aims to explore the  
101 current state of knowledge regarding the association between undernutrition and measles, and to  
102 highlight any evidence gaps.

103

## 104 **Review questions:**

- 105 • Does malnutrition impact morbidity, mortality, and incidence of measles, and to what extent?
- 106 • Does measles cause or contribute to malnutrition, and to what extent?
- 107 • What are the potential pathways underlying the relationship between measles and  
108 malnutrition?

## 109 **Methodology:**

### 110 **Selection of articles**

111 An exploratory review was conducted from July 2021 to February 2022, using various combinations of  
112 the following search terms in all fields: “measles”, “malnutrition”, “malnourished”, maln\*”,  
113 “undernutrition”, and “undernourish\*”. This search query was conducted in Pubmed and Google  
114 Scholar’s databases and yielded 822 articles. Following feedback from senior research supervisors, the  
115 search was updated in March 2022 with keywords relating to “vitamin A”, “retinol”, “serum retinol”,  
116 “hyporetinemia” and measles. This update was limited to entries from 2018 to 2022 and yielded 55  
117 additional articles. A sample search strategy for Pubmed can be found in S1 File.

118 After the identification process, the remaining articles’ abstracts were screened and, where an abstract  
119 was unavailable, full texts scanned through, to determine eligibility.

120 As this review focuses on the association between malnutrition and measles, studies that examined  
121 another primary variable were excluded (e.g., diseases other than measles). Noma, in particular, was the  
122 main topic in 196 articles, and those studies were excluded during screening.

123 To be included in the review, a study had to:

- 124 • Report on a measure of association, a relationship or potential mechanisms behind the link  
125 between malnutrition and measles; and
- 126 • Be published in English or French.

127 Case series, editorials, commentaries, animal studies and studies that could not isolate the effect of  
128 measles or malnutrition, were excluded (i.e., effect size assigned to multiple, concurrent causes).

129 Five additional studies were identified by snowballing and through consultations with experts.



130 Following the Preferred Reporting Items for Systematic Reviews and Meta-Analyses (“PRISMA”) flow  
131 diagram’s criteria presented in Fig 1, 67 studies were included in the review.

132 **Fig 1. PRISMA Flow Diagram of the Study Selection Process.** Snowballing refers to using the references  
133 or citations of a record to identify further studies of interest.

134  
135 This review followed the reporting guidelines of the Preferred Reporting Items for Systematic Reviews  
136 and Meta-Analyses extension for Scoping Reviews (“PRISMA-ScR”) checklist (see S2 File). As it aimed to  
137 explore the key characteristics around the malnutrition-measles relationship and to identify current  
138 evidence gaps, the scoping review approach was selected over the systematic review.(14)

139

## 140 **Expert consultations**

141 Expert consultations were held during August 2021 to identify any potentially missing relevant literature  
142 and to obtain critical input on important areas of discussion.

143

144 Four experts in the fields of immunology, respiratory and tropical medicine, respiratory viruses, nutrient  
145 metabolism and tropical pediatrics, and global health and micronutrient malnutrition, were invited.

146 Experts were identified through a snowballing approach, expanding from the professional networks of  
147 two senior research supervisors.

148

149 In March 2022, a final draft manuscript was sent out to these experts for feedback.

150

## 151 **Study characteristics**

152 Studies that fulfilled the inclusion criteria are presented in S1 Table. Much of the evidence on the  
153 relationship between measles and malnutrition is based on older studies, whereas studies from 1991  
154 onwards tend to look at vitamin A supplementation and deficiency.

155 The majority of the articles retained were published more than 10 years prior (See Fig 2):

### 156 **Fig 2. Number of studies published per 10-year period about measles and malnutrition.**

157 22 studies were reviews, of which 6 included a meta-analysis, and 45 were primary research reports  
158 with the following study designs:

- 159 - Descriptive studies (10);
- 160 - Analytical observational studies (i.e., cohort and case-control studies) (32); and
- 161 - Analytical experimental studies (i.e., randomized controlled trials (“RCT”)). (3)

162 Data from retained studies was extracted by using a charting table in Excel. This process was iterative,  
163 and the variables to extract were continuously updated following feedback from expert consultations  
164 and senior reviewers. Data was charted for the following variables: author(s), year of publication, type of  
165 study, setting, epidemiologic setting, independent variable(s) of interest, dependent variable, aspect of  
166 measles studied, measure of association, determination of a measles case, indicator of vitamin A  
167 deficiency (if applicable), vitamin A supplementation regimen (if applicable), malnutrition nomenclature,  
168 definition of a malnourished case.

169 Articles were grouped according to the main variables (i.e. measles, malnutrition, vitamin A deficiency,  
170 vitamin A supplementation) they studied. All charted data was synthesized in supplementary tables (see  
171 S1 Table to S5 Table).

## 172 **Definitions of malnutrition**

173 The term “malnutrition” involves a large spectrum of nutritional impairments, including deficiencies,  
174 and excesses or imbalances in energy and/or nutrient intake. As the publication period of included  
175 studies ranges from 1969 to 2021, definitions of a malnourished case varied widely. Some of the  
176 nomenclature is no longer in use. S2 Table presents the distribution of different malnutrition  
177 (undernutrition) definitions across the studies reviewed.

178 To ensure that the evidence from this review can be translated into practice, findings are categorized  
179 according to the most current definitions of malnutrition, as per UNICEF’s classification (13):

- 180 - Undernutrition (i.e., macronutrient deficiencies);
- 181 - Micronutrient deficiencies; and
- 182 - Overnutrition

183 As overnutrition was not investigated in the retained studies, this paper will refer to malnutrition in the  
184 sense of undernutrition and micronutrient deficiencies. In terms of micronutrient status, all articles  
185 examined vitamin A deficiency and supplementation, save for two studies which looked at zinc  
186 supplementation.

187 The earliest label for malnutrition was “protein-calorie malnutrition (PCM)”, which came into use in the  
188 1960s. (15) Half of the articles that defined malnutrition as PCM, assessed the condition via weight-for-  
189 age standard deviations. The remaining articles did not specify how PCM was assessed.

190 In the 1970s, “protein-calorie malnutrition” transitioned into “protein-energy malnutrition (PEM)”. (16)  
191 Under the WHO and the Food and Agriculture Organization (“FAO”) definitions, PEM encompassed “a  
192 range of pathological conditions arising from coincident lack, in varying proportions, of protein and  
193 calories, occurring most frequently in infants and young children, and commonly associated with

194 infections". (16) In the literature, PEM generally refers to two main syndromes defined by specific  
195 clinical signs and symptoms: kwashiorkor and marasmus. Kwashiorkor refers to a form of oedematous  
196 malnutrition, characterized by skin depigmentation and sloughing, and fatty liver. (17) Marasmus refers  
197 to a loss of subcutaneous fat and muscle atrophy and is often seen as a wasting syndrome. (17)  
198 "Marasmic kwashiorkor", representing clinical features from both marasmus and kwashiorkor, was  
199 examined in one of the studies reviewed. In total, 9 studies used some variation of the PEM  
200 nomenclature.

201 Wasting and stunting are defined by the WHO as "weight for height as an indicator of the present state  
202 of nutrition (i.e. acute malnutrition / wasting) and height for age as an indicator of past nutrition (i.e.  
203 chronic malnutrition / stunting)". (18). Some studies also measured malnutrition as being  
204 "underweight", a composite of stunting and/or wasting.

205 Most studies defined stunting, wasting and underweight as per the WHO's anthropometric standards.  
206 (19) Stunting was defined as a height-for-age Z-score (HAZ) below -2 (i.e. more than 2 S.D. below the  
207 population median), wasting was defined as a weight-for-height Z-score below -2, and underweight was  
208 defined as weight-for-age Z-score below -2. (19) In three historical studies from the 1970s, however,  
209 Harvard standards were used instead and expressed degrees of malnutrition according to percentages  
210 below a standard median (i.e. 90%, 80%, 70%, 60%). (20-22) Six studies also used mid-upper arm  
211 circumference (MUAC) as an indicator for severe acute malnutrition ("SAM") in infants and children 0 to  
212 95 months. (23-28)

## 213 **Definitions of a measles case**

214 A measles case is typically identified through clinical signs and symptoms, laboratory confirmation or  
215 epidemiological linkage.(29)

216 The WHO classifies measles cases in three categories:(29)

- 217 1. Suspected case: presence of fever and characteristic rash, or an individual suspected by a  
218 health-care worker to be infected with measles.
- 219 2. Clinically compatible measles: presence of fever, characteristic rash and either symptoms of  
220 coughing, coryza and/or conjunctivitis.
- 221 3. Confirmed case:
- 222 a. Epidemiologically linked: a suspected case of measles geographically and temporally  
223 linked with dates of rash onset occurring 7–23 days apart from a laboratory-confirmed  
224 or another epidemiologically linked measles case
- 225 b. Laboratory confirmed: IgM antibody detection for measles by enzyme immunoassay,  
226 detection of measles-specific RNA by RT-PCR or viral isolation by cell culture.

227 In this review, 29% (16/56) of the studies identified measles cases through the use of clinical signs and  
228 symptoms, 18% (10/56) used serological testing, of which 4% (2/56) also included epidemiological  
229 linkage, and 54% (30/56) did not specify how measles cases were defined.

230 In addition, clinical signs and symptoms used to define a case tended to vary in older historical studies.  
231 One study defined severe measles as the manifestation of unusually severe inflammatory change in a  
232 tissue known to be infected with measles (e.g.: extensive epidermal desquamation, severe keratitis,  
233 conjunctivitis) and two others identified cases through maternal and community reporting by asking  
234 about measles by its local name.

235 S3 Table presents the distribution of measles definitions across the studies reviewed.

## 236 **Definitions of vitamin A deficiency**

237 Cases of vitamin A deficiency are primarily identified using biochemical indicators (i.e. serum retinol,  
238 breast milk retinol and/or serum retinol binding protein) and/or clinical eye signs (e.g. Bitot’s spots,  
239 corneal xerosis, keratomalacia, corneal scars).(30) Biomarkers are used as surrogate indicators of liver

240 retinol reserves, which are considered as the gold standard to assess vitamin A status. Overt clinical  
241 damage to the eye are typically late manifestations of vitamin A deficiency.(30) However, several  
242 biomarkers of vitamin A status, such as retinol and retinol binding protein, may be confounded by the  
243 effects of inflammation, as they are themselves negative acute phase proteins.(31)

244 From 1963 to 1996, international guidance for serum retinol cut-off values recommended any  
245 concentrations below 10 µg/100 ml, or 0.35 µmol/L, among children younger than 6 years old, to be  
246 indicative of a deficiency.(32) In 1992, that cut-off was considered too low to identify asymptomatic  
247 individuals with subclinical vitamin A deficiency. (32) The recommended cut-off was modified to  
248 concentrations below 20 µg/100 ml, or 0.70 µmol/L, among children 6-71 months of age, in 1996. (32)

249 Six out of the fifteen studies on vitamin A deficiency in this review used serum retinol as indicator (See  
250 S4 Table). While three of them were published prior to 1996, the serum retinol threshold in those  
251 studies was 0.70 µmol/L, as per current guidelines. Two studies used clinical eye signs, one used  
252 conjunctival eye cytology, another used the molar ratio of retinol-binding protein to transthyretin, and 5  
253 articles did not specify how vitamin A deficiency was assessed.

## 254 **Vitamin A supplementation approaches**

255 This review considers two types of vitamin A supplementation approaches: preventative and  
256 therapeutic.

257 A typical preventative program includes providing two high-dose vitamin supplements each year among  
258 children 6-59 months, in areas with high under-5 mortality.(33)

259 Current measles management guidelines recommend providing therapeutic vitamin A supplementation  
260 to children under 5 years old who are infected with measles, as well as to adult measles patients with a  
261 suspected vitamin A deficiency. (34)

262 S5 Table presents the characteristics of all vitamin A supplementation studies included in this review.

## 263 **Findings on the association between measles and** 264 **malnutrition**

265 Studies investigated three different aspects of measles: incidence, mortality, and/or morbidity and its  
266 associations with malnutrition status.

## 267 **Vitamin A and susceptibility to measles infections**

### 268 **Vitamin A deficiency**

269 In 1987, a community study in Ethiopia found that vitamin A-deficient children were 4.7 times more  
270 likely to develop measles ( $p = 0.01$ ) than children that were not vitamin A-deficient. (35)

### 271 **Preventative vitamin A supplementation**

272 In 1997, a community based RCT found that the self-reported rate of measles cases was lower, although  
273 non-significantly ( $p=0.33$ ), among children supplemented with vitamin A (100,000 international units  
274 (“IU”) for children aged 6-11 months or 200,000 IU for older children).(26) However, measles cases were  
275 identified through maternal reports, and the authors indicate that other diseases which cause rash and  
276 fever could have erroneously been reported as measles.(26)

277 A 2011 meta-analysis of 43 randomized controlled trials conducted between 1976 and 2010 found that  
278 vitamin A supplementation (i.e., varying dosage from 10 000 IU to 200 000 IU) was associated with a  
279 50% reduced incidence of measles (95% confidence interval (“CI”): 0.37 to 0.67). (36) On the Grading of  
280 Recommendations, Assessment, Development and Evaluations (“GRADE”) scale, this evidence was  
281 considered as being of high quality. (36) This finding was reinforced by two Cochrane reviews in 2017  
282 and 2022, which also concluded that vitamin A supplementation could reduce measles incidence by

283 50%, albeit their GRADE rating was reduced to moderate quality. (37, 38) This review included the same  
284 studies as the 2011 meta-analysis. The authors did not detail why the quality of evidence was modified;  
285 however, GRADE involves some subjective judgments and different sets of evaluators may rate a body of  
286 evidence differently.(39)

287 In 2021, a research report in India found that children 12 to 59 months old who received preventative  
288 vitamin A supplementation were 77% less at risk of getting measles (95% CI: 0.08-0.66).(40)

## 289 **Measles and increased susceptibility to vitamin A deficiency**

290 Three studies found that measles can lead to or exacerbate vitamin A deficiency. (41-43) However, only  
291 one of these studies quantified the extent of measles' influence: in India, children infected with measles  
292 were 9 times (95% CI: 2.75 – 31.19) more likely to develop subclinical vitamin A deficiency after the  
293 infection.(43)

## 294 **Bi-directional relationship between undernutrition and** 295 **measles infections**

296 Several community- and hospital-based studies reported significant associations between measles  
297 incidence and undernutrition. (23, 42, 44-48) In Yemen, suspected measles infections were three times  
298 higher among SAM cases (4.5%,  $p < 0.00$ ) than in adequately nourished (1.4%) and in moderately  
299 malnourished (1.2%) children. (44) Another community study found that the identification of measles  
300 cases with fever and skin rash symptoms during an outbreak was 24.9 times more likely among  
301 malnourished children (i.e. aged 6 to 60 months) (95% CI: 1.9-329.6).(23) In Romania, reported measles  
302 cases were 3.4 times more likely than controls to have had a history of malnutrition (95% CI: 1.1-9.9).  
303 (45) In 2018, modelling from sub-national regions of Namibian aggregated measles incidence data from



304 2005 to 2014 found the risk of measles to be associated with the prevalence of underweight children  
305 under 5 years of age (95% CI: 0.0019, 0.1128).(49)

306 Additionally, measles was also found to cause weight loss in young children, more than other acute  
307 diseases. (47) Severely underweight children (weight-for age  $<-3$  standard deviations) were 1.7 times  
308 more likely to have had a history of measles in the preceding 6 months (95% CI: 1.3 – 2.4). (46) In  
309 Pakistan, measles cases  $< 9$  months old were three times more likely to be malnourished than older  
310 children (95% CI: 1.2-7.5). (48)

## 311 **Malnutrition and measles-related mortality**

312 In 2021, data from the Global Burden of Disease study database identified four main risk factors for  
313 measles-related deaths: wasting, underweight, stunting, and vitamin A deficiency.(50)

## 314 **Vitamin A deficiency**

315 A pooled analysis of 134 population-based surveys from 83 countries found that vitamin A-deficient  
316 people were 1.26 times more likely to die from measles (95% CI: 0.84–1.87), though this result was not  
317 statistically significant. (51) In those countries, 11, 200 measles deaths were estimated to be attributable  
318 to vitamin A deficiency in 2013. (51)

## 319 **Therapeutic vitamin A supplementation**

320 In 2005, a review of RCTs in which vitamin A therapy in varying doses was initiated after measles  
321 diagnosis found that vitamin A supplementation led to no significant reduction in the risk of mortality.  
322 (52) The authors highlighted, however, that factors such as greater vitamin A doses, hospitalization, age  
323 and geographic area, defined by the case-fatality rate in the region, could impact the effect size  
324 observed. (52) Within the same review, the subset of studies that found a statistically significant 64%  
325 reduction in the risk of mortality, all looked at vitamin A supplementation given in doses of 200,000 IU

326 on two successive days, hospitalized patients, children under 2 years old, and were set in areas where  
327 the case-fatality rate was more than 10%. (52) Those factors are notable across previously published  
328 studies.

329 Trials from the 80s to the early 2000s in which a reduction in mortality is noted were generally hospital-  
330 based. (53-57) However, vitamin A in hospitalized patients does not consistently lead to a significant  
331 decrease in mortality risk, and effect sizes seem to vary depending on age, the type of complications and  
332 the degree of pre-existing malnutrition. (53, 56, 57) A 1992 review of hospital-based clinical trials found  
333 that two doses of 200,000 IU vitamin A given on successive days, or 20,000 IU daily for one to three  
334 weeks, reduced measles-related mortality in hospitalized children, however the effect was most  
335 significant in children under 2 years old. (56, 57) In India, patients with post-measles complications were  
336 56% less likely to die when supplemented with 200 000 IU vitamin A on 2 successive days. (53) Those  
337 findings are consolidated in a 2002 meta-analysis which found that patients who received two doses of  
338 200,000 IU vitamin A given on 2 consecutive days had 64% significantly lower overall mortality (Risk  
339 ratio (“RR”): 0.36; 95% CI: 0.14-0.82).(58) This impact was more important among children under 2 years  
340 old, where overall mortality risk dropped by 83% (RR: 0.17; 95% CI: 0.03-0.61).(58)

341 In 2 other meta-analyses of hospital-based studies, vitamin A supplementation significantly decreased  
342 the odds of mortality by 54% (95% CI: 18% - 72%) to 61% (95% CI: 22% – 66%). (54) (55) In both studies,  
343 vitamin A dosage was highly variable (see S4 Table).

344 In community-based articles, a 2021 study conducted during an outbreak in the Philippines found that  
345 children who did not receive vitamin A supplementation during measles episodes had significantly  
346 higher odds of mortality, nearly two-fold (Odds ratio (“OR”): 1.93; 95% CI: 1.31-2.85).(59) Compared to  
347 those who were treated with vitamin A, not receiving vitamin A supplementation increased the odds of  
348 death nearly two-fold (OR: 1.93; 95% CI: 1.31-2.85).(59) In 2017, another outbreak investigation found

349 that children who did not receive vitamin A supplementation during measles illness had 2.3 times (95%  
350 CI: 0.74-7.4) increased risk, though non-significant, of mortality. (60) One 1997 study found no  
351 significant difference ( $p=0.51$ ) in acute measles case fatality between children supplemented with 100  
352 000 to 200 000 IU vitamin A (15.4%) and non-supplemented children (14.5%).(26)

## 353 **Preventative vitamin A supplementation**

354 In a 1993 meta-analysis of community trials, the effect size was small but statistically significant in one  
355 study: children who received periodic vitamin A supplementation (i.e. 810 retinol equivalents per gram  
356 of dietary monosodium glutamate, a sodium salt used as flavor enhancer, or 8333 IU to 200 000 IU given  
357 once or every 4 to 6 months) were 25% to 30% less likely to die from measles. (55) Age was also an  
358 influential factor: vitamin A seemed more effective among younger children, though the specific age  
359 threshold was not specified. (55) In 1997, another review of 4 community studies indicated that vitamin  
360 A prophylaxis reduced measles mortality by about 50%. (61) The risk ratios in those studies, however,  
361 showed high variability (i.e. 0.58, 0.24, 0.67 and 0.82), where vitamin A would decrease the risk of  
362 measles mortality by 42%, 76%, 33% and 18%. (61)

363 In 2015, a pooled analysis of randomized trials found that vitamin A supplementation as a preventative  
364 intervention in community settings was associated with a 14% (95%: -8% - 32%) non-significant reduction  
365 in measles mortality. (51) Similarly, in 2017 and 2022, two Cochrane reviews concluded that vitamin A  
366 supplementation did not have a significant effect on mortality due to measles, however this evidence  
367 was graded as having low certainty. (37, 38)

## 368 **Undernutrition**

369 Out of 11 studies, 7 supported an association between undernutrition and measles mortality, (50, 62-67)  
370 2 found no association, (68, 69) and two reviews found the evidence inconclusive.(70, 71) In 2004, a  
371 review of cohort studies found that 44.8% of measles-related deaths in young children were attributable

372 to undernutrition. (64) In 2021, the most recent estimations of global measles burden evaluated that  
373 more than 50% of measles-related deaths were attributed to childhood wasting in high and middle-high  
374 socio-demographic index regions.(50) The socio-demographic index is an indicator of development  
375 status strongly correlated with health outcomes, and is a composite average of the incomes per capita,  
376 years of schooling and fertility rates in a country. (50) In addition, the study estimated that this  
377 proportion has been gradually increasing since 1990.(50) Among Somali refugees, acute malnutrition  
378 was an independent risk factor for measles mortality: malnourished children were 7.6x more likely to  
379 die from measles infections. (62) 3 other studies also noted that malnourished children had higher  
380 measles case-fatality rates, though only 1 of them quantified the extent to which it was higher (63, 65,  
381 67) In Zimbabwe, stunted children had a case-fatality rate 1.7 times higher than children with a height-  
382 for-age 90% or more ( $p < 0.05$ ). (65) In rural Ghana, case fatality odds were 2.5 times (95% CI: 1.3-5.1)  
383 significantly higher in underweight children.(26) The authors of that study note, however, that case  
384 fatality estimates may have been overestimated as measles-related deaths were identified through  
385 informal reports.(26)

386 In 2008, another retrospective study also found that declining malnutrition rates among under-fives  
387 were associated with declining measles case-fatality rates. (66) Finally, a 2021 study noted that  
388 hospitalized children admitted with measles complications were 5.23 times more likely to die ( $p < 0.0001$ )  
389 if they were stunted.(72)

390 4 community-based studies concluded that mortality from measles-associated illness was not related to  
391 undernutrition. (68, 69, 73, 74) Instead, factors such as overcrowding (i.e. clustering of cases) and the  
392 intensity of exposure to the disease were more important determinants of measles mortality. (68) (73)  
393 (74)

394 In 2009, a study looked at risk factors that could explain measles mortality rate variations in community-  
395 based trials. (71) The consensus regarding malnutrition was conflicting, and outcomes varied depending  
396 on how malnourished cases were defined, which lacked uniformity. (71)

397 In 2017, another study concluded that malnutrition, assessed in the community by comparing photos of  
398 normal and malnourished children, was not significantly associated with an increased risk of measles-  
399 related mortality.(60)

## 400 **Malnutrition and measles-related morbidity**

### 401 **Vitamin A deficiency and therapeutic supplementation**

402 In 2017, a position paper published by the WHO indicated that vitamin A deficiency was associated with  
403 delayed recovery and a higher risk of measles-related complications.(75) Most recently, a 2022 review  
404 highlighted that vitamin A deficiency was commonly observed during measles and that this condition  
405 was associated with greater measles-related ocular morbidities and disease severity. (76) Another study  
406 in Ethiopia found that measles was one of the main, preventable underlying causes for severe visual  
407 impairment among 13.5% to 25% of blind students aged 6 years to 25 years.(77) In 2019, a review found  
408 that serum retinol levels dropped in children affected with measles, and that more important decreases  
409 were observed during severe episodes. (78)

410 In Zambia, acute measles patients who were vitamin A-deficient were 2.5 times (95% IC: 1.1 – 5.7) more  
411 likely to suffer from unresolved pneumonia (i.e. infected children with pneumonia at baseline which  
412 persisted after 2 weeks). (79) However, vitamin A supplementation could improve those odds. Vitamin-A  
413 deficient children who received supplementation as a single oral dose of 210  $\mu$ mol retinol as retinyl  
414 esters were 80% less likely to suffer from unresolved pneumonia (OR = 0.2; 95% IC: 0.05 – 0.71). (79)

415 In 2016, a review of RCTs on the use of vitamin A supplementation upon hospital admission to prevent  
416 measles-related ocular morbidities concluded that evidence current to 2015 was insufficient to support  
417 the benefit of vitamin A to prevent blindness.(80) In the United States, a 2020 hospital-based study  
418 examined the median length of hospital stay among measles patients who received vitamin A and those  
419 who did not receive any doses. The study found no significant differences between the two groups, but  
420 it is notable that none of the patients had received the amount of therapeutic vitamin A currently  
421 recommended for their respective age groups.(81) In addition, laboratory assessment of vitamin A  
422 status prior to receiving supplementation was only conducted for 2 out of 142 patients (0.1%).(81) It is  
423 possible that some of the patients did not have deficient vitamin A levels, which may have reduced the  
424 impact of therapeutic vitamin A supplementation.

425 In 2021, another study in high-income countries found that 2 doses of oil-based vitamin A provided to  
426 children hospitalized with measles did not reduce the risk of measles-related morbidities.(82)

## 427 **Vitamin A preventative supplementation**

428 In India, measles complications and case-fatality rates were higher among children who did not receive  
429 routine, preventative vitamin A supplementation ( $p < 0.05$ ). (83) However, the dosage supplemented  
430 was not specified.

## 431 **Zinc therapeutic supplementation**

432 In 2001, a study reported on an unpublished RCT which investigated zinc supplementation therapy for  
433 children hospitalized with measles and pneumonia. (54) The authors found that, after receiving 40 mg of  
434 zinc daily for 5 days, the clinical course of measles did not differ between the cases (i.e. zinc  
435 supplemented) and the control groups (i.e. placebo). (54) In 2017, a systematic Cochrane review also  
436 only returned that one randomised trial. (84) The reviewers concluded that the quality of the current

437 evidence was very low, and that further research was necessary to determine whether zinc  
438 supplementation provided any benefits or harms for measles treatment.(84)

## 439 **Undernutrition**

440 In 1985, a review concluded that overcrowding was more likely to be a primary predisposing factor for  
441 severe measles than protein-energy malnutrition. (85) Crowded housing led to more secondary cases,  
442 which had more complications and a higher mortality rate than index cases. (85) The authors  
443 hypothesized that overcrowded, high-density settings led to a higher initial viral load in the infected and  
444 secondary cases then absorbed a higher amount of virus.(85) In 1986, another study found that the  
445 duration of measles symptoms (i.e. fever, rash and cough), was not significantly different across children  
446 with different levels of malnutrition. (86) In addition, no significant difference was found in the  
447 development of measles-related complications (i.e. lower respiratory infections, diarrhea) and  
448 hospitalization due to the severity of measles between well-nourished and malnourished children.(86) In  
449 Mauritania, however, factors of poor prognosis for measles patients included malnutrition ( $p = 0.0059$ ).  
450 (87) Moreover, a hospital-based cohort study found that measles was a preceding precipitating factor in  
451 30.7% of severe protein-energy malnutrition cases (i.e. kwashiorkor and marasmus). (88)

452 In 1979, a study found that malnourished children (i.e. those with marasmus and marasmic kwashiorkor)  
453 infected with measles were more prone to develop severe ulcerative herpes during the course of the  
454 illness ( $p < 0.001$ ). Mouth ulcers took on average two to three weeks to heal and, due to the pain  
455 discouraging oral intake, malnourished children lost further weight by the time this complication was  
456 resolved.(22) In 1981, another study had more conflicting findings: in non-hospitalized children,  
457 malnourished measles cases were significantly more susceptible ( $p < 0.001$ ) to herpes simplex virus  
458 infections than non-malnourished cases. However, this association was not observed in hospitalized,  
459 severe measles cases.(89)

460 Finally, in 2008, a survey found that measles-related complications were significantly higher ( $p < 0.001$ )  
461 among severely undernourished children.(27) Complications included diarrhea, pneumonia, ear  
462 infection or any other complications that led to hospitalization.(27)

### 463 **Immunosuppression as post-measles complications**

464 In 1971, a case-control study based on necropsies found that measles may depress cell-mediated  
465 immunity, and that a synergistic effect of measles and protein-calorie malnutrition could compound  
466 measles' morbidity. (90) In 1973, a study concluded that immunosuppression observed during measles  
467 may be due to a direct effect of the virus rather than one mediated by malnutrition, but that severe  
468 protein-calorie malnutrition could still likely impair cell-mediated immunity through different synergistic  
469 pathways. (20) In 1980, peripheral blood mononuclear cells from malnourished and non-malnourished  
470 children were infected in vitro with measles virus. None of these children had a history of measles and  
471 were previously negative for the presence of measles-specific antibody. The study found that the  
472 subsequent viral load in the peripheral blood mononuclear cells of malnourished children was  
473 significantly greater ( $p < 0.05$ ).(91) In addition, the study found that cell-mediated and humoral immune  
474 response to measles infection was apparently well-preserved in a state of malnutrition: there was no  
475 significant difference between malnourished and non-malnourished children in the serum levels of  
476 antibodies produced and in the body's ability to kill measles-infected cells.(91) Another study in 1986  
477 found that in children infected with measles, the degree of immunosuppression was not significantly  
478 different between malnourished and well-nourished children. Cell-mediated immune response to  
479 mitogen-induced T-cell proliferation was low in all measles cases irrespective of nutritional status.(86) In  
480 1987, a study found no significant decrease in the total white blood cell or monocyte counts between  
481 the acute, symptomatic phase and the convalescent phases of measles. (28) However, total T-cell  
482 counts were significantly lower during acute symptomatic measles ( $p < 0.001$ ).(28) In addition, compared



483 to well nourished children under five years old, those who were malnourished had lower T-cell counts  
484 during acute measles ( $p < 0.025$ ). (28)

485 Another study in 2002 hypothesized that changes in lymphocyte levels during infection may contribute  
486 to measles-related immunosuppression. (92) The authors examined children hospitalized with measles  
487 and found that wasted children had lower lymphocyte counts than those who were not wasted. (92)  
488 However, lymphocyte counts did not predict disease severity. (92) In addition, stunted children were  
489 observed with higher lymphocyte levels than non-stunted ones, however the mechanisms behind these  
490 changes and their importance were unclear. (92)

491 In 2004, a study examined the effects of acute measles in malnourished children in Nigeria, comparing  
492 measles cases enrolled within 1 week of a generalized maculopapular rash onset and non-measles  
493 controls. (93) In cases, plasma interleukin (IL) – 12 levels were significantly lower and plasma cortisol  
494 was significantly higher. (93) IL-12 is a type of cytokine that is a key regulator of cell-mediated immune  
495 responses. (93) Cortisol, as a glucocorticoid, can suppress the synthesis and release of IL-12. (93) The  
496 authors hypothesized that impaired hepatic synthesis of a binding protein for cortisol was the cause of  
497 the marked hypercortisolemia observed in underweight, wasted and measles cases. (93)

498

## 499 **Findings on the potential pathways behind the** 500 **association between measles and malnutrition**

501 **Measles predisposing to vitamin A deficiency** Vitamin A is one of the key  
502 micronutrients essential for a well-regulated immune system. In the body, its three active forms are  
503 retinol, retinal and retinoic acid. (94) Most of the mechanisms through which vitamin A modulates the

504 immune response are driven by retinoic acid. (94) However, the form that circulates in the blood is  
505 mainly retinol. (32) Retinol is released from the liver, where most of total body vitamin A is stored, in  
506 response to tissue demand. (32) It is then converted into retinoic acid as needed. When severely  
507 depleted (<0.07 umol/L) or extremely high (> 1.05 umol/L), serum retinol is used as an indicator of  
508 hepatic vitamin A levels. (32)

509 None of the studies reviewed investigated how vitamin A deficiency may predispose to measles  
510 infection or to the development of measles complications. All articles examined how measles potentially  
511 instigated vitamin A deficiency.

512 Four studies found that hyporetinemia (i.e. serum retinol < 0.07 umol/L) occurred during acute measles  
513 episodes or was associated with measles infection. (56, 93, 95, 96)

514 In one review, the authors hypothesized that measles may impede the release of retinol to peripheral  
515 tissues. (56) As previously mentioned, hyporetinemia may reflect depletion of liver stores and total body  
516 vitamin A deficiency. (56). Among measles patients, however, hyporetinemia occurred even when  
517 hepatic vitamin A stores were adequate, as well as in communities where vitamin A deficiency was not  
518 prevalent. (56) In addition, following measles recovery, serum retinol rose back to normal levels without  
519 any vitamin A supplementation. (56) Another community study also noted that low serum retinol was  
520 triggered independently of the original vitamin A status. (95) Suggested causal mechanisms included an  
521 increased demand for the micronutrient while availability is decreased due to lower intake or  
522 malabsorption. (95) In Nigeria, a case-control study indicated that cytokines, released as part of the  
523 immune response, may have decreased the production of retinol-binding protein and transthyretin. (93)  
524 This would then have triggered a drop in serum retinol. (93)

## 525 **Impact of nutritional status on measles through the immune** 526 **system**

527 Two studies looked at mechanisms potentially involving the effect of nutritional status on the immune  
528 system's response to measles.

529 In 1977, a hospital-based study identified malnutrition as a factor in measles persistence, defined as  
530 evidence of the virus being present (i.e. giant cells in nasal secretions and/or formed through  
531 lymphocyte response to phytohemagglutinin) six to thirteen days after onset of rash. (21) Persistent  
532 measles was found in 40% (12/30) of malnourished children post-measles and in none of the well-  
533 nourished ones (0/25). (21) In addition, compared to controls, malnourished cases had significantly  
534 blunted immune responses to tested antigens (i.e. *Candida*, measles). (21) It was hypothesized that  
535 malnutrition may have depressed cell-mediated immunity, prolonging the measles episode, which then  
536 further impairs the immune system and the malnourished state. (21)

537 In a review of clinical trials, measles led to depressed CD4 T-cells numbers. (96) CD4 T-cells can be  
538 general indicators of immune status. Measles cases who received vitamin A supplementation, however,  
539 had a significant reductions in measles morbidity and significant increases in lymphocyte levels and  
540 measles antibody concentrations. (96) Vitamin A was therefore hypothesized to improve measles  
541 prognosis by inducing improvements in CD4 T-cells numbers. (96)

## 542 **Gut barrier**

543 In 1975, a hospital-study looked at malnourished measles cases compared to non-measles controls with  
544 moderate to severe kwashiorkor. (97) The authors found that cases patients with measles may be  
545 associated with protein-losing enteropathy. (97)

546 Another study also noted that gastrointestinal protein loss was significantly higher during an acute  
547 measles episode, as opposed to after recovery. (98) In that sample, all the children studied were  
548 underweight and had diarrhea. (98) In addition, a significantly higher level of gut malabsorption was  
549 observed in children with measles enteritis during an acute measles attack, indicating that acute  
550 measles may contribute to malabsorption in the proximal small intestine. (98) Faecal protein loss, in  
551 combination with malabsorption, may be a significant contributors to the development of malnutrition  
552 after measles. (98)

## 553 Discussion

554 This review points to a positive correlation between vitamin A deficiency and greater incident measles  
555 case reporting, measles-related complications, and morbidity, as well as between undernutrition and  
556 incident measles reporting, as well as measles mortality. There is also evidence for a negative  
557 correlation between preventative vitamin A supplementation and measles incidence, and between  
558 therapeutic vitamin A supplementation and measles-related mortality.

### 559 Estimating the impact of malnutrition on measles incidence

560 Among studies which investigated measles incidence, 31% (4/13) relied on clinical signs and symptoms,  
561 15% (2/13) on reported cases in hospital records, and 15% (2/13) on serological results from national  
562 surveillance data to recruit measles cases. 38% (5/13) did not specify how a case was defined.

563 The term “incidence” throughout this manuscript is used as per the reviewed studies’ original  
564 terminology. However, while those studies aimed to evaluate the rate at which new measles cases  
565 occurred in relation to the risk factors investigated (e.g., malnutrition), there are concerns around the  
566 use of that term as incident case data may be under-reported and not accurately represent the  
567 occurrence of new measles cases over the period of time studied.

568 The use of clinical signs and symptoms implies that a measles case may have been more likely to be  
569 identified, especially through informal reporting, once symptoms are overt or severe (i.e., acute measles  
570 episodes). Likewise, hospital records may suggest that the disease had progressed to a point where  
571 hospitalization was required. Of the two studies which used serological confirmation, one was  
572 conducted during an outbreak. Without systematic screening, it is likely that a number of new cases may  
573 have been omitted. As such, the reported use of incidence data may not be entirely accurate and  
574 underestimated in high-risk regions. This review interprets the findings of studies on measles incidence  
575 as an impact on the likelihood of acute measles reporting rather than an impact on actual incidence.

576

## 577 **Vitamin A**

578 This review shows that a well-established association exists between vitamin A deficiency and increased  
579 likelihood of incident measles case reporting, though few studies quantified the extent of that  
580 relationship. (35-37, 41-43) In addition, two meta-analyses concluded that routine vitamin A  
581 supplementation can lower reported measles incidence by 50%. (36, 37)

582 The evidence on the association between vitamin A deficiency, preventative vitamin A supplementation  
583 and measles mortality was more conflicting, but methodologically it is often challenging to estimate  
584 impacts on measles mortality because the identification of deaths from measles is challenging in many  
585 countries due to limitations of vital statistics, incomplete reporting and laboratory investigation of cause  
586 of death. All studies on preventative vitamin A supplementation were in community settings, where  
587 data reporting is not systematic and may be more difficult. On the other hand, high-quality studies show  
588 that therapeutic vitamin A supplementation, given in two doses of 200,000 IU, can significantly reduce  
589 measles-related mortality. In that dosage, vitamin A therapy was particularly impactful for children

590 under 2 years old. In addition, the observed benefits of this supplementation can be greater in  
591 hospitalized children and in those who live in geographical areas with high case-fatality rates.(52)

592 There is also evidence of vitamin A deficiency being associated with greater measles-related  
593 complications (i.e., ocular morbidities, pneumonia), disease severity and delayed recovery.(79) Of note,  
594 however, is that those studies used serum retinol as an indicator for vitamin A deficiency. In young  
595 children, a multi-country meta-analysis (i.e., the BRINDA project) found that retinol was statistically,  
596 negatively correlated with inflammation, and that an inflammatory state could overestimate vitamin A  
597 deficiency. (99) Inflammation is triggered as part of the immune system's reaction to harm, such as  
598 infections. When adjusted for inflammation, vitamin A deficiency prevalence dropped by -22.1% to  
599 -6.0%. (99) The studies reviewed did not take into account the effects of inflammation on vitamin A  
600 biomarker concentrations. If the studies reviewed had adjusted their vitamin A deficiency rates, there is  
601 a possibility that the strength of the association observed may have been weaker.

602 The evidence on vitamin A supplementation, both therapeutic and preventative, and measles morbidity  
603 in this review was more limited, likely due to the timeframe of the search query relating to vitamin A  
604 being restricted to 2018 to 2022. Only 4 out of the 67 studies reviewed examined therapeutic vitamin A  
605 supplementation and measles-related morbidities, and a single study reported on preventative vitamin  
606 A supplementation. Lack of routine vitamin A supplementation significantly increased measles  
607 complications, though this study did not specify whether supplementation was for previously vitaminA  
608 deficient children. (83) While three studies found that vitamin A therapy led to no significant impact on  
609 reducing measles-related morbidities, one of them highlighted that the vitamin A doses provided in their  
610 study were lower than the current recommended regimen, which may lessen the predicted effect size.

611 In terms of potential mechanistic pathways, historical studies seem to concur with the BRINDA project:  
612 hyporetinemia among children with measles infections may not necessarily correlate with depleted liver

613 stores. (99) In a community trial, hyporetinemia was triggered independently of vitamin A status. (95)  
614 Another study hypothesized that measles may impede the release of vitamin A from liver stores as  
615 hyporetinemia occurred despite vitamin A stores being adequate. (56) The release of cytokines, as part  
616 of the immune inflammatory response to infections, may inhibit the production of retinol-binding  
617 protein and transthyretin. (93) Both of those transport proteins are responsible for carrying retinol from  
618 hepatic stores to target tissues, and this mechanism could explain why infections trigger hyporetinemia.  
619 Measles may increase the demand in vitamin A while body availability is decreased. (95) This would  
620 concur with previous reviews on vitamin A and infections, which found that systemic vitamin A  
621 deficiency was triggered as a result of infection-induced anorexia and malabsorption. (100)  
622 The data on the potential pathways behind measles and vitamin A deficiency remain very limited. None  
623 of the studies reviewed looked at the potential pathways through which vitamin A supplementation  
624 could decrease measles incidence and mortality. Only one study found that vitamin A supplementation  
625 increased lymphocyte levels and measles antibody concentrations, thus reducing morbidity risk. (96)

## 626 **Undernutrition**

627 All the studies in this review consistently reported an association between undernutrition and the  
628 increased likelihood of incident cases reporting. In all 5 studies, undernutrition significantly increased  
629 reported measles incidence by 1.7 to 24.9 times (OR: 1.7, 3.0, 3.0, 3.4, 24.9). (23, 44-46, 48) 3 studies  
630 also found that measles was an important contributing factor to malnutrition, and that it could increase  
631 the risk of malnutrition threefold. (42, 47, 48)

632 The evidence for an association between malnutrition and measles mortality is less consistent, though 6  
633 out of 10 studies found a positive correlation between malnutrition and measles mortality. (62) (63) (64)  
634 (65-67) 2 of those studies found that malnutrition increased the risk of dying from measles by 1.7 and  
635 7.6. times (62, 65) However, the estimate of 7.6 was imprecise, with a wide confidence interval from 1.3

636 to 44.3. (62) Reviews of community studies, on the other hand, suggested no significant association  
637 between measles mortality and malnutrition. (68, 70, 71) Wolfson et al., (2009), in particular,  
638 highlighted that those outcomes varied widely depending on the definition of malnutrition used in each  
639 study trial. Heterogeneity in malnutrition nomenclature was also noted in this review. (71)

640 Few studies examined the relationship between measles morbidity and malnutrition, and results among  
641 them varied. One review of community studies found that overcrowding was more likely to be a  
642 predisposing factor to severe measles than malnutrition, (85) while 2 hospital-based studies found that  
643 malnutrition and measles were precipitating factors for each other's morbidity. (87, 88)

644 All studies on malnutrition and measles were observational, likely due to ethical challenges in exploring  
645 this topic with an experimental design. A randomized controlled trial cannot be conducted by  
646 purposefully exposing participants to a harmful variable such as malnutrition or measles. Observational  
647 studies, however, can be more vulnerable to biases and confounding factors, which can weaken the  
648 strength of inferences that we can draw from them. The heterogeneity of malnutrition and measles  
649 cases definitions across studies also makes estimating a combined effect size challenging and open to  
650 potential information biases (i.e. classification errors). Some of the outdated definitions, in particular,  
651 are more prone to those systematic biases and misclassification. In older studies, stunting and wasting  
652 were often classified as standalone cases. However, those two conditions share several common  
653 determinants, often leading to concurrent stunting and wasting. (101) Wasting, in particular, is  
654 associated with increased risk of stunting. (101) In an analysis of datasets from 84 countries, 37.5% of  
655 wasted cases were also concurrently stunted. (102) It is thus difficult to isolate the effects of stunting  
656 and wasting, independently, on measles. Underweight was more recently added as a composite  
657 indicator to account for cases afflicted with both stunting and wasting, however it was not in use in  
658 historical studies. Likewise, historical studies did not employ the standardized WHO classification for  
659 measles cases, and signs and symptoms used during clinical assessment were widely variable. In



660 addition, the more recent studies do not consistently rely on the more rigorous serological testing to  
661 confirm measles cases. Almost a third of the studies reviewed identify measles cases through reported  
662 signs and symptoms, which is more prone to erroneous identification. Half of the studies did not specify  
663 how measles cases were defined.

664 Finally, few studies detailed the severity of malnutrition cases. Yet, the trend in which hospital studies  
665 have stronger associations than community trials may suggest that the degree of malnutrition is an  
666 underlying factor. Severely malnourished cases are more likely to be hospitalized and to be included in  
667 those studies than mild cases.

668 The synergy between infections and malnutrition has often been documented in the literature: chronic  
669 or recurrent infections exacerbate malnutrition, and malnutrition impairs host defense and increases  
670 susceptibility to infections (103-106) However, the causal pathways leading to that association are still  
671 inadequately understood and there is a lack of strong studies able to characterize the extent to which  
672 malnutrition contributes to infections (105). This review points to similar findings with regards to  
673 potential bidirectional relationship between measles and malnutrition. The number of studies which  
674 explored the causal mechanisms behind their association is limited (6).

## 675 **Potential pathways**

676 Among purported mechanisms, the three main ones involve an impaired immune system, impaired gut  
677 health and gut-lung axis and/or metabolic changes.

## 678 **Immune system and cytokines**

679 This review suggests that malnutrition and measles may both trigger immunosuppressive pathways.

680 One hospital trial found that malnourished children had significantly blunted immune responses to  
681 antigens of measles and *Candida* yeast, a skin infection. (21) Findings from a systematic review in 2014  
682 seem to concur, noting that undernourished children exhibit atrophy of lymphoid tissue and of the

683 thymus gland. (107) One of the lymphatic system's roles is to produce immune cells while the thymus  
684 develops T-cells, white blood cells responsible for recognizing antigens and fighting off infections as part  
685 of the adaptative immune response. Studies have also noted that children with kwashiorkor and  
686 marasmus produce fewer total counts of acute-phase proteins and pro-inflammatory cytokines. (103)  
687 Those signaling molecules are the body's initial response to infection or tissue damage and are needed  
688 to activate the receptors to produce an immune reaction. (103) In addition, undernutrition can shorten  
689 the life span of monocytes, white blood cells involved in the recognition and destruction of harmful  
690 organisms. (103) Regarding measles and cell-mediated immunity, one study identified that measles  
691 decreased the levels of circulating IL-12 cytokines in malnourished children. (93) As IL-12 is produced by  
692 cells such as monocytes, this could potentially be one of the pathways that mutually reinforces the  
693 synergy between malnutrition and measles. (93)

694 Previous studies have also found that measles infection had an impact on the lymphatic system, and  
695 that it was associated with lower levels of circulating lymphocytes and with their depletion in lymphoid  
696 tissues. (108) However, while lymphocytes levels normalized after the resolution of measles symptoms,  
697 immune suppression persisted for several weeks to years after the initial infection. (108, 109) Those  
698 findings suggest that measles may be triggering disease-specific immune mechanisms. (108) A 2019  
699 study highlighted that the measles virus infects key immune cells, including memory cells. (109)  
700 Following infection, immunological memory seems to be restructured, leading to a loss of memory cells  
701 from previous infections and to an impaired bone marrow. (109) The bone marrow normally produces  
702 naïve B-cells, which are meant to become memory cells that secrete antibodies after being exposed to  
703 an antigen. (109) Under normal physiological conditions, constant repopulation of naïve B-cells ensures  
704 that the body can maintain a diverse antibody repertoire. (109) Immune diversity, however, was  
705 severely diminished in 10% of measles cases. (109) In another study, measles pruned back 11% to 73%  
706 of pre-existing antibody repertoires. (110) Through this mechanism, measles likely causes a reduced

707 recognition of infectious pathogens and an increased susceptibility to infections, including diseases  
708 against which a child was previously vaccinated.

709 Current understandings indicate that both measles and malnutrition suppress the immune system.  
710 Malnutrition can be a factor in measles persistence, akin to the effect of measles on the lymphatic  
711 system. (21) It is possible that co-occurring conditions in an individual might magnify the effects  
712 observed through those immune pathways and exacerbate malnutrition and/or measles outcomes.  
713 Further studies to confirm this hypothesis have to be conducted.

## 714 **Gut health and gut-lung axis**

715 Studies on gut health demonstrate that the gut interacts closely with the immune system. The surface  
716 of the gut is an immune sensor that detects pathogens, and the intestinal wall regulates the passage of  
717 viable bacteria from the gastrointestinal tract to other sites. (104) In addition, recent understandings on  
718 the gut's microbiome suggest that it is highly involved with immune homeostasis. (104) In a 2018  
719 review, dysbiosis (i.e. imbalance in the gut's microbiome) was found to be a precursor to infection. (104)  
720 Two historical studies also found that malnourished measles cases, as opposed to non-measles  
721 malnourished controls, were associated with protein-losing enteropathy and malabsorption. Both  
722 outcomes can precipitate an already nutritionally deficient state, in addition to worsening an already  
723 vulnerable immune status. (97, 98)

724 In addition, malnutrition was found to be associated with disturbances to the integrity of the intestinal  
725 mucosa, gut-barrier functions and gut microbial communities. (103, 104) A systematic review found that  
726 malnourished children had atrophied intestinal walls, which would likely have increased intestinal  
727 permeability and predisposed those children to bacterial translocation from the gut into the  
728 bloodstream. (107) Atrophied intestinal mucosa would also have a reduced surface area for absorption.  
729 Children with an impaired gut likely do not absorb the quantity of nutrients required to sustain an

730 optimal nutritional status. (104) These findings may concur with the ones from historical studies, though  
731 they may also point to a role for the degree of malnutrition.

732 None of the studies reviewed explored how measles might lead to those consequences. However,  
733 growing evidence reinforces the concept of a gut-lung axis, in which respiratory infections may be able  
734 to impact gut health. (111) In response to infections, recent research suggests that immune cells and  
735 metabolites use the mesenteric lymphatic system to migrate from the gut to the lungs and modulate  
736 lung immune response. (111, 112) The presence of certain types of gut bacteria is essential to produce  
737 those cells at the gut site, and dysbiosis might displace them. (112) In addition, studies have  
738 documented events of lung diseases triggering increases in the gut's bacterial load, changing its  
739 composition. (112) The gut-lung axis could potentially be an alternative pathway through which measles  
740 and malnutrition reinforce their synergistic relationship, though further evidence is required to refine  
741 this understanding.

## 742 **Metabolic factors**

743 While this review did not identify any potential metabolic factors in the relationship between measles  
744 and malnutrition, infections are known to impair child growth via several pathways: increased leptin  
745 secretion, increased energy expenditure, limited nutrient availability and uptake, and disruption in the  
746 digestive systems' regulation. (113)

747 For instance, sustained release of cytokines in response to chronic infections causes an increase in leptin  
748 secretion, a hormone which suppresses the appetite. (106, 113) Persistent measles identified in  
749 malnourished children could therefore compound undernutrition in those children. This acute-phase  
750 response to infection also tends to lead to a negative energy balance. (103) As part of their role as  
751 signaling molecules, cytokines can mediate the induction of fever, and energy expenditure is increased  
752 by 7 to 11% for each unit (degrees Celsius) increase in fever. (103) In people infected with measles, fever

753 usually ranges from 39°C to 40.5°C and lasts 4 to 7 days. (114) If there are complications, fever may  
754 persist ever longer. (114) In addition, pro-inflammatory cytokines can inhibit the process by which bone  
755 tissue and the growing skeleton are formed. (106)

756 Activating the immune system may also limit the availability of certain key nutrients (e.g. iron, vitamin A,  
757 zinc), diverting them away from responding to nutritional needs. (113) Finally, older studies of severely  
758 malnourished children have also found that their gastric acid production was greatly reduced, increasing  
759 their susceptibility to infection. (103)

## 760 **Limitations**

761 A scoping review was conducted as this paper aims to investigate the current state of knowledge on  
762 measles and malnutrition, and to map the evidence gaps. As such, this manuscript is not a systematic  
763 review, however it represents an overall assessment of the current body of evidence. Nine studies were  
764 also excluded despite reporting a measure of association as the effect of measles on malnutrition, or the  
765 effect of malnutrition on measles, could not be isolated from other variables (i.e. exclusion criteria).  
766 Search queries including terms related to “vitamin A”, “serum retinol” and “hyporetinemia” were  
767 limited to studies published 2018 thereafter. Moreover, the pool of studies that examined direct  
768 mechanistic pathways between malnutrition and measles was very small. There were also no consistent  
769 definitions for malnutrition and measles cases, which led to difficulties in estimating a cumulative effect  
770 size for associations between the nutritional status and measles.

771 All study designs on undernutrition were descriptive or observational, which reduced their internal  
772 validity. Moreover, few studies examining the impact of measles on undernutrition controlled for  
773 potential confounding factors such as maternal nutrition, postnatal diet, breastfeeding practices,  
774 maternal height, parental education, household assets and micronutrient deficiencies such as zinc and  
775 iron. Those factors are determinants of childhood malnutrition. (101) Some studies investigating the

776 effect of malnutrition on measles did not control for vaccination status and many did not specify the  
777 epidemiological setting (e.g., endemic, outbreak). Both variables could modify the observed rates of  
778 measles incidence, severity and mortality. In addition, out of the studies that examined the impact of  
779 vitamin A supplementation on measles, few specified whether prior vitamin A status of the children  
780 receiving supplementation was investigated. Pre-existing vitamin A deficiency could have been a  
781 modifying factor in the results observed. The supplementation regimens varied widely, and some had  
782 unspecified dosage. Moreover, in studies that assessed vitamin A status, inflammation was seldom  
783 taken into account, despite it being able to cause overestimations in vitamin A deficiency. Due to scope  
784 and time restrictions, we did not include studies whose main topic was on noma, a disease that has  
785 often been noted in measles and malnutrition settings. While some studies accounted for measles-  
786 related gastrointestinal complications, none of them examined noma as a secondary variable in the  
787 measles-malnutrition relationship either.

788 Finally, this review was limited to studies published in English and in French.

789 S6 Table summarizes the methodological limitations of this review.

## 790 **Evidence Gaps**

791 The current state of knowledge on preventative vitamin A is strongest in relation to reported incident  
792 measles cases. Statistical evidence on the role of preventative vitamin A supplementation on measles-  
793 related deaths, however, could be improved. In terms of vitamin A therapy, high doses, provided for  
794 hospitalized, young children, and in high case-fatality rates settings, seems more likely to derive benefits  
795 from the supplementation. However, the extent to which each of those factors individually contribute to  
796 the effect size has not been investigated. Regarding vitamin A deficiency, emerging evidence throws into  
797 question the use of serum retinol as a reliable indicator of vitamin A status in a context of inflammation.

798 Evidence gaps remains in assessing the potential impacts of these findings on previous conclusions on  
799 vitamin A deficiency and measles.

800 Current evidence on measles and malnutrition relies on narrative reviews and original research reports  
801 of descriptive and observational studies, likely due to ethical challenges in designing randomized  
802 controlled trials for this topic. Across all studies reviewed, there was also high variability in the effects or  
803 outcomes being evaluated due to the use of different undernutrition definitions. Variability in  
804 underlying populations was also present, as studies encompassed settings in hospitals, communities and  
805 acute crises (i.e., conflict, famine). This lack of homogeneity may be a challenge to conduct a meta-  
806 analysis with a stronger, cumulative effect size.

807 Little data was available to shed light on the potential pathways behind malnutrition and measles. On  
808 the other hand, many studies explore the pathophysiology of measles and malnutrition separately.  
809 Further research is needed to fully explain how measles impacts the nutritional state, and vice versa.

810 Finally, while certain key nutrients are known to have an active role in the immune system (e.g., iron,  
811 zinc), this review identified few articles which isolated the impact of micronutrients other than vitamin  
812 A. The only studies on the effect of therapeutic zinc supplementation on measles-related morbidities  
813 concluded that the current evidence was of very low quality and that further research was necessary.

## 814 Conclusion

815 The findings from this review reinforces the hypothesis of a synergistic relationship between measles  
816 and malnutrition. Measles infection is an important contributing factor to malnutrition, potentially  
817 increasing the risk of being malnourished threefold. Observational data has also consistently underlined  
818 a positive correlation between undernutrition and reported incident measles case data. Evidence on the  
819 potential impacts of malnutrition on measles mortality is weaker, however a positive correlation has  
820 been documented between both conditions. The extent to which malnutrition affects measles mortality,  
821 however, remains imprecise. Few studies examined the relationship between measles morbidity and  
822 malnutrition, and results among them were conflicting. Likewise, few studies reported on vitamin A  
823 supplementation, both therapeutic and preventative, and measles-related morbidities. It is therefore  
824 difficult to conclude on the association between these variables. However, the most recent Cochrane  
825 meta-analysis concluded that vitamin A supplementation was associated with a clinically meaningful  
826 reduction in childhood morbidity, highlighting its benefits for non-specific morbidities.(38)

827 All studies reviewed found an association between vitamin A deficiency and the increased likelihood of  
828 incident measles reporting, measles-related complications and/or death. Two doses of 200,000 IU  
829 therapeutic vitamin A could significantly reduce the odds of measles-related mortality. There is also  
830 robust evidence that supports the use of preventative vitamin A campaigns to reduce measles incidence.  
831 Moreover, though the two most recent reviews of randomized trials found that preventative vitamin A  
832 had non-significant effects on mortality specifically due to measles, there is high-quality evidence for  
833 vitamin A supplementation reducing the risk of all-cause infantile mortality by 12% to 24%.(37, 115)  
834 Routine provision of vitamin A supplements therefore remains highly beneficial, especially in areas  
835 where vitamin A deficiency is a public health concern, and where measles is endemic.



836 Incorporating a nutrition strategy into public health frameworks aiming to prevent and combat measles  
837 outbreaks may therefore be a necessity. The available evidence for a bidirectional relationship between  
838 malnutrition and measles disease supports the use of integrated platforms to simultaneously provide  
839 both vaccination and nutritional services, particularly in globally underserved communities where multi-  
840 dimensional deprivations across health and nutrition sectors are likely to occur. Current WHO  
841 guidelines recommend bi-annual delivery of preventative vitamin A supplements to children 6 to 59  
842 months old, integrated into public health initiatives such as national measles vaccination campaigns.  
843 (115)

844 The potential pathways between malnutrition and measles remain poorly defined, and the number of  
845 well-conducted studies on undernutrition and measles is limited. Much of the research is dated; the  
846 field of nutritional research has made many advances in the interim. Further research on the specific  
847 causal mechanisms underlying measles and malnutrition is needed. Insight on this evidence gap may  
848 allow us to refine better pathophysiological targets for both therapeutic and preventive interventions.  
849 Additional studies with the use of a standardized, consistent approach to defining malnutrition would  
850 also be important to ensure the comparability of outcomes between different studies and trials. This  
851 would facilitate the determination of a cumulative effect size and allow for stronger inferences of  
852 findings to policy making.

## 853 Acknowledgements

854 This scoping review was initiated as part of a remunerated internship with the Early Childhood Nutrition  
855 Unit of the United Nations Children's Fund (UNICEF) and was completed within a research contract  
856 funded by the World Health Organization (WHO).

857 The final research paper is the result of the generous support and sharing of insight from many  
858 individuals who provided their time and expertise throughout its development, in particular: Natasha S  
859 Crowcroft (Department of Immunisation, Vaccines, and Biologicals, World Health Organization, Geneva,  
860 Switzerland) and Andreas Hasman (UNICEF Programme Division, New York, New York, USA), for their  
861 mentorship, feedback on draft versions of the manuscript, and guidance in structuring this review and  
862 formulating its overarching goals, refining the search methodology and coordinating this project's  
863 execution; Tracey S Goodman (Department of Immunization, Vaccines and Biologicals, World Health  
864 Organization, Geneva, Switzerland), for her guidance, incredible patience in responding to questions and  
865 inquiries, and feedback on the manuscript; and Kim Mulholland (Infection and Immunity Theme, New  
866 Vaccines group, Murdoch Children's Research Institute, Melbourne, Australia; Department of  
867 Paediatrics, University of Melbourne, Melbourne, Australia; Department of Infectious Disease  
868 Epidemiology, London School of Hygiene and Tropical Medicine, London, United Kingdom) and Robert  
869 Bandsma (Centre for Global Child Health, The Hospital for Sick Children, Toronto, Ontario, Canada;  
870 Department of Nutritional Sciences, Faculty of Medicine, University of Toronto, Toronto, Canada), for  
871 their critical input on the key pieces of scientific literature and important areas of investigation to focus  
872 on.

## 873 References

- 874 1. World Health Organization PAHO. Measles.  
875 2. World Health O. Measles vaccines: WHO position paper, April 2017 - Recommendations.  
876 Vaccine. 2019;37(2):219-22.  
877 3. Patel MK, Goodson JL, Alexander JP, Jr., Kretsinger K, Sodha SV, Steulet C, et al. Progress Toward  
878 Regional Measles Elimination - Worldwide, 2000-2019. MMWR Morb Mortal Wkly Rep.  
879 2020;69(45):1700-5.  
880 4. World Health Organization, UNICEF. Immunization data: progress and challenges with sustaining  
881 and advancing immunization coverage during the COVID-19 pandemic. In: World Health Organization,  
882 UNICEF, editors. 2020 WHO/UNICEF Estimates of National Immunization Coverage (WUENIC 2020)2021.  
883 5. World Health Organization. Global Measles and Rubella Update - August 2021. 2021.  
884 6. Food and Agriculture Organization of the United Nations (FAO) IFFADI, UNICEF, World Food  
885 Programme (WFP), World Health Organization (WHO). The State of Food Security and Nutrition in the  
886 World 2021. 2021.  
887 7. UNICEF. Tracking the situation of children during COVID-19. In: UNICEF, editor. 2021.  
888 8. Headey D, Heidkamp R, Osendarp S, Ruel M, Scott N, Black R, et al. Impacts of COVID-19 on  
889 childhood malnutrition and nutrition-related mortality. The Lancet. 2020;396(10250):519-21.  
890 9. Ritchie H. How could the war in Ukraine impact global food supplies? : Our World in Data,; 2022  
891 [Available from: How could the war in Ukraine impact global food supplies?  
892 10. Qi S, Jia C, Yin Y. Measles. Radiology of Infectious Diseases: Volume 1. 2015:515-40.  
893 11. Moss WJ. Measles. Lancet. 2017;390(10111):2490-502.  
894 12. Srouf ML, Marck K, Baratti-Mayer D. Noma: Overview of a Neglected Disease and Human Rights  
895 Violation. Am J Trop Med Hyg. 2017;96(2):268-74.  
896 13. UNICEF. The state of the world's children 2019 - Children, food and nutrition - Growing well in a  
897 changing world. 2019.  
898 14. Munn Z, Peters MDJ, Stern C, Tufanaru C, McArthur A, Aromataris E. Systematic review or  
899 scoping review? Guidance for authors when choosing between a systematic or scoping review approach.  
900 BMC Medical Research Methodology. 2018;18(1).  
901 15. World Health Organization. Assessment of Nutritional Status - 6 - Special Problems in Different  
902 Groups.  
903 16. Gurney JM. The Young Child: Protein-Energy Malnutrition. In: Jelliffe DB, Jelliffe EFP, editors.  
904 Nutrition and Growth. Boston, MA: Springer US; 1979. p. 185-216.  
905 17. Pham TP, Alou MT, Golden MH, Million M, Raoult D. Difference between kwashiorkor and  
906 marasmus: Comparative meta-analysis of pathogenic characteristics and implications for treatment.  
907 Microb Pathog. 2021;150:104702.  
908 18. World Health Organization. WHO Expert Committee on Physical Status: the Use and  
909 Interpretation of Anthropometry Physical status. 1995.  
910 19. World Health Organization. Nutrition Landscape Information System (NLIS) country profile  
911 indicators:  
912 interpretation guide. 2010.  
913 20. Whittle HC, Bradley-Moore A, Fleming A, Greenwood BM. Effects of measles on the immune  
914 response of Nigerian children. Arch Dis Child. 1973;48(10):753-6.  
915 21. Dossetor J, Whittle HC, Greenwood BM. Persistent measles infection in malnourished children.  
916 Br Med J. 1977;1(6077):1633-5.

- 917 22. Whittle HC, Smith JS, Kogbe OI, Dossetor J, Duggan M. Severe ulcerative herpes of mouth and  
918 eye following measles. *Transactions of the Royal Society of Tropical Medicine and Hygiene*.  
919 1979;73(1):66-9.
- 920 23. Nassar AAH, Al Amad MA, Qasim M, Dureab F. Risk factors for measles outbreak in Ataq and  
921 Habban districts, Shabwah governorate, Yemen, February to May 2018. *BMC Infect Dis*. 2021;21(1):551.
- 922 24. Kikafunda JK, Walker AF, Collett D, Tumwine JK. Risk factors for early childhood malnutrition in  
923 Uganda. *Pediatrics*. 1998;102(4):E45.
- 924 25. Voorhoeve HW. Measles, mortality and malnutrition. *J Trop Pediatr*. 1992;38(3):140-1.
- 925 26. Dollimore N, Cutts F, Binka FN, Ross DA, Morris SS, George Smith P. Measles Incidence, Case  
926 Fatality, and Delayed Mortality in Children with or without Vitamin A Supplementation in Rural Ghana.  
927 *American Journal of Epidemiology*. 1997;146(8):646-54.
- 928 27. Mishra A, Mishra S, Lahariya C. Under Nutrition and Measles Related Complications in an  
929 Outbreak of Measles. *Indian Journal of Public Health*. 2008;52(4):221-3.
- 930 28. Dagan R, Phillip M, Sarov I, Skibin A, Epstein S, Kuperman O. Cellular Immunity and T-  
931 Lymphocyte Subsets in Young Children With Acute Measles. *Journal of Medical Virology*.  
932 1987;22(2):175-82.
- 933 29. World Health Organization. *Vaccine-Preventable Diseases Surveillance Standards: Measles*.  
934 2018.
- 935 30. Tanumihardjo SA, Russell RM, Stephensen CB, Gannon BM, Craft NE, Haskell MJ, et al.  
936 *Biomarkers of Nutrition for Development (BOND)-Vitamin A Review*. *J Nutr*. 2016;146(9):1816S-48S.
- 937 31. Namaste SML, Ou J, Williams AM, Young MF, Yu EX, Suchdev PS. Adjusting iron and vitamin A  
938 status in settings of inflammation: a sensitivity analysis of the Biomarkers Reflecting Inflammation and  
939 Nutritional Determinants of Anemia (BRINDA) approach. *The American Journal of Clinical Nutrition*.  
940 2020;112(Supplement\_1):458S-67S.
- 941 32. World Health Organization. *Serum retinol concentrations for determining the prevalence of*  
942 *vitamin A deficiency in populations Geneva2011*.
- 943 33. UNICEF. *Vitamin A Supplementation: A statistical snapshot*. In: UNICEF, editor. New York2016.
- 944 34. World Health Organization. *Guide for clinical case management and infection prevention and*  
945 *control during a measles outbreak*. Geneva; 2020.
- 946 35. De Sole G, Belay Y, Zegeye B. Vitamin A deficiency in southern Ethiopia. *Am J Clin Nutr*.  
947 1987;45(4):780-4.
- 948 36. Mayo-Wilson E, Imdad A, Herzer K, Yakoob MY, Bhutta ZA. Vitamin A supplements for  
949 preventing mortality, illness, and blindness in children aged under 5: systematic review and meta-  
950 analysis. *Bmj*. 2011;343:d5094.
- 951 37. Imdad A, Mayo-Wilson E, Herzer K, Bhutta ZA. Vitamin A supplementation for preventing  
952 morbidity and mortality in children from six months to five years of age. *Cochrane Database Syst Rev*.  
953 2017;3(3):Cd008524.
- 954 38. Imdad A, Mayo-Wilson E, Haykal MR, Regan A, Sidhu J, Smith A, et al. Vitamin A  
955 supplementation for preventing morbidity and mortality in children from six months to five years of age.  
956 *Cochrane Database Syst Rev*. 2022;3:CD008524.
- 957 39. Schünemann H, Brożek J, Guyatt G, Oxman A. *GRADE Handbook2013*.
- 958 40. Lowang D, Dhuria M, Yadav R, Myllem P, Sodha SV, Khasnobis P. Measles outbreak among  
959 children  $\leq 15$  years old, Jaintia Hills District, Meghalaya, India, 2017. *Indian J Public Health*.  
960 2021;65(Supplement):S5-S9.
- 961 41. Sachdeva S, Alam S, Beig FK, Khan Z, Khalique N. Determinants of vitamin A deficiency amongst  
962 children in Aligarh District, Uttar Pradesh. *Indian Pediatr*. 2011;48(11):861-6.
- 963 42. Toole MJ, Waldman RJ. The public health aspects of complex emergencies and refugee  
964 situations. *Annu Rev Public Health*. 1997;18:283-312.

- 965 43. Khandait DW, Vasudeo ND, Zodpey SP, Kumbhalkar DT. Risk factors for subclinical vitamin A  
966 deficiency in children under the age of 6 years. *J Trop Pediatr*. 2000;46(4):239-41.
- 967 44. Dureab F, Al-Falahi E, Ismail O, Al-Marhali L, Al Jawaldeh A, Nuri NN, et al. An Overview on Acute  
968 Malnutrition and Food Insecurity among Children during the Conflict in Yemen. *Children (Basel)*.  
969 2019;6(6).
- 970 45. Donadel M, Stanescu A, Pistol A, Stewart B, Butu C, Jankovic D, et al. Risk factors for measles  
971 deaths among children during a Nationwide measles outbreak - Romania, 2016-2018. *BMC Infect Dis*.  
972 2021;21(1):279.
- 973 46. Chisti MJ, Hossain MI, Malek MA, Faruque AS, Ahmed T, Salam MA. Characteristics of severely  
974 malnourished under-five children hospitalized with diarrhoea, and their policy implications. *Acta*  
975 *Paediatr*. 2007;96(5):693-6.
- 976 47. Morley D. Severe measles in the tropics. I. *Br Med J*. 1969;1(5639):297-300 contd.
- 977 48. Saleem AF, Zaidi A, Ahmed A, Warraich H, Mir F. Measles in children younger than 9 months in  
978 Pakistan. *Indian Pediatr*. 2009;46(11):1009-12.
- 979 49. Ntirampeba D, Neema I, Kazembe L. Modelling spatio-temporal patterns of disease for spatially  
980 misaligned data: An application on measles incidence data in Namibia from 2005-2014. *PLOS ONE*.  
981 2018;13(8):e0201700.
- 982 50. Wang R, Jing W, Liu M, Liu J. Trends of the Global, Regional, and National Incidence of Measles,  
983 Vaccine Coverage, and Risk Factors in 204 Countries From 1990 to 2019. *Front Med (Lausanne)*.  
984 2021;8:798031.
- 985 51. Stevens GA, Bennett JE, Hennocq Q, Lu Y, De-Regil LM, Rogers L, et al. Trends and mortality  
986 effects of vitamin A deficiency in children in 138 low-income and middle-income countries between  
987 1991 and 2013: a pooled analysis of population-based surveys. *Lancet Glob Health*. 2015;3(9):e528-36.
- 988 52. Huiming Y, Chaomin W, Meng M. Vitamin A for treating measles in children. *Cochrane Database*  
989 *Syst Rev*. 2005;2005(4):Cd001479.
- 990 53. Madhulika, Kabra SK, Talati A. Vitamin A supplementation in post-measles complications. *J Trop*  
991 *Pediatr*. 1994;40(5):305-7.
- 992 54. Mahalanabis D, Bhan MK. Micronutrients as adjunct therapy of acute illness in children: impact  
993 on the episode outcome and policy implications of current findings. *Br J Nutr*. 2001;85 Suppl 2:S151-8.
- 994 55. Fawzi WW, Chalmers TC, Herrera MG, Mosteller F. Vitamin A supplementation and child  
995 mortality. A meta-analysis. *Jama*. 1993;269(7):898-903.
- 996 56. Hussey GD, Klein M. Measles-induced vitamin A deficiency. *Ann N Y Acad Sci*. 1992;669:188-94;  
997 discussion 94-6.
- 998 57. Barclay AJ, Foster A, Sommer A. Vitamin A supplements and mortality related to measles: a  
999 randomised clinical trial. *Br Med J (Clin Res Ed)*. 1987;294(6567):294-6.
- 1000 58. D'Souza RM. Vitamin A for the Treatment of Children with Measles--A Systematic Review.  
1001 *Journal of Tropical Pediatrics*. 2002;48(6):323-7.
- 1002 59. Domai FM, Agrupis KA, Han SM, Sayo AR, Ramirez JS, Nepomuceno R, et al. Measles outbreak in  
1003 the Philippines: epidemiological and clinical characteristics of hospitalized children, 2016-2019. *Lancet*  
1004 *Reg Health West Pac*. 2022;19:100334.
- 1005 60. Mafigiri R, Nsubuga F, Ario AR. Risk factors for measles death: Kyegegwa District, western  
1006 Uganda, February–September, 2015. *BMC Infectious Diseases*. 2017;17(1).
- 1007 61. Sommer A. Vitamin A prophylaxis. *Arch Dis Child*. 1997;77(3):191-4.
- 1008 62. Mahamud A, Burton A, Hassan M, Ahmed JA, Wagacha JB, Spiegel P, et al. Risk factors for  
1009 measles mortality among hospitalized Somali refugees displaced by famine, Kenya, 2011. *Clin Infect Dis*.  
1010 2013;57(8):e160-6.
- 1011 63. Perry RT, Halsey NA. The clinical significance of measles: a review. *J Infect Dis*. 2004;189 Suppl  
1012 1:S4-16.

- 1013 64. Caulfield LE, de Onis M, Blössner M, Black RE. Undernutrition as an underlying cause of child  
1014 deaths associated with diarrhea, pneumonia, malaria, and measles. *Am J Clin Nutr.* 2004;80(1):193-8.
- 1015 65. Lepage P, De Mol P, Hennart P. Measles mortality and malnutrition in Rwanda. *Lancet.*  
1016 1983;2(8356):965.
- 1017 66. Marufu T, Siziya S, Mudambo KS. Factors associated with secular trends in mortality attributed  
1018 to measles in Gweru, Zimbabwe, in 1967-89. *J Trop Pediatr.* 2008;54(2):114-9.
- 1019 67. Mahmud AS, Alam N, Metcalf CJE. Drivers of measles mortality: the historic fatality burden of  
1020 famine in Bangladesh. *Epidemiol Infect.* 2017;145(16):3361-9.
- 1021 68. Aaby P. Malnutrition and overcrowding/intensive exposure in severe measles infection: review  
1022 of community studies. *Rev Infect Dis.* 1988;10(2):478-91.
- 1023 69. Koster FT, Curlin GC, Aziz KM, Haque A. Synergistic impact of measles and diarrhoea on nutrition  
1024 and mortality in Bangladesh. *Bull World Health Organ.* 1981;59(6):901-8.
- 1025 70. Singh J, Sharma RS, Verghese T. Measles mortality in India: a review of community based  
1026 studies. *J Commun Dis.* 1994;26(4):203-14.
- 1027 71. Wolfson LJ, Grais RF, Luquero FJ, Birmingham ME, Strebel PM. Estimates of measles case fatality  
1028 ratios: a comprehensive review of community-based studies. *Int J Epidemiol.* 2009;38(1):192-205.
- 1029 72. Brekhna A, Areesh F, Rehmana W, Nighat H, Asma B, Syed Hashim R. Risk factors for mortality  
1030 among admitted children with complications of measles in Pakistan – an observational. *Journal of the*  
1031 *Pakistan Medical Association.* 2020:1-14.
- 1032 73. Aaby P, Bukh J, Lisse IM, Smits AJ. OVERCROWDING AND INTENSIVE EXPOSURE AS  
1033 DETERMINANTS OF MEASLES MORTALITY. *American Journal of Epidemiology.* 1984;120(1):49-63.
- 1034 74. Aaby P, Bukh J, Lisse IM, Da Silva MC. Decline in measles mortality: nutrition, age at infection, or  
1035 exposure? *BMJ.* 1988;296(6631):1225-8.
- 1036 75. World Health Organization. Measles vaccines: WHO position paper - April 2017. *Wkly Epidemiol*  
1037 *Rec.* 2017;92(17):205-27.
- 1038 76. Hübschen JM, Gouandjika-Vasilache I, Dina J. Measles. *The Lancet.* 2022;399(10325):678-90.
- 1039 77. Asferaw M, Woodruff G, Gilbert C. Causes of severe visual impairment and blindness in students  
1040 in schools for the blind in Northwest Ethiopia. *BMJ Glob Health.* 2017;2(2):e000264.
- 1041 78. Strebel PM, Orenstein WA. Measles. *New England Journal of Medicine.* 2019;381(4):349-57.
- 1042 79. Rosales FJ. Vitamin a supplementation of vitamin a deficient measles patients lowers the risk of  
1043 measles-related pneumonia in zambian children. *J Nutr.* 2002;132(12):3700-3.
- 1044 80. Bello S, Meremikwu MM, Ejemot-Nwadiaro RI, Oduwole O. Routine vitamin A supplementation  
1045 for the prevention of blindness due to measles infection in children. *Cochrane Database of Systematic*  
1046 *Reviews.* 2011.
- 1047 81. Hester GZ, Nickel AJ, Stinchfield PA, Spaulding AB. Low Use of Vitamin A in Children Hospitalized  
1048 for Measles in the United States. *Pediatr Infect Dis J.* 2020;39(4):e45-e6.
- 1049 82. Lo Vecchio A, Cambriglia MD, Bruzzese D, Guarino A. Vitamin A in Children Hospitalized for  
1050 Measles in a High-income Country. *Pediatr Infect Dis J.* 2021;40(8):723-9.
- 1051 83. Mishra A, Mishra S, Jain P, Bhadoriya RS, Mishra R, Lahariya C. Measles related complications  
1052 and the role of vitamin A supplementation. *Indian J Pediatr.* 2008;75(9):887-90.
- 1053 84. Awotiwon AA, Oduwole O, Sinha A, Okwundu CI. Zinc supplementation for the treatment of  
1054 measles in children. *Cochrane Database of Systematic Reviews.* 2017;2017(6).
- 1055 85. Aaby P, Coovadia H. Severe measles: a reappraisal of the role of nutrition, overcrowding and  
1056 virus dose. *Med Hypotheses.* 1985;18(2):93-112.
- 1057 86. Bhaskaram P, Madhusudhan J, Radhakrishna KV, Reddy V. Immune response in malnourished  
1058 children with measles. 1986;v. 32.
- 1059 87. Boushab BM, Savadogo M, Sow MS, Dao S. [Epidemiological, clinical, and prognostic study of the  
1060 measles in the Aioun regional hospital in Mauritania]. *Med Sante Trop.* 2015;25(2):180-3.

- 1061 88. Oyedeji GA. The present day epidemiology of severe protein-energy malnutrition in Nigeria. *Clin*  
1062 *Pediatr (Phila)*. 1984;23(11):623-8.
- 1063 89. Orren A, Kipps A, Moodie JW, Beatty DW, Dowdle EB, McIntyre JP. Increased Susceptibility to  
1064 Herpes Simplex Virus Infections in Children with Acute Measles. *Infection and Immunity*. 1981;31(1):1-6.
- 1065 90. Smythe PM, Brereton-Stiles GG, Grace HJ, Mafoyané A, Schonland M, Coovadia HM, et al.  
1066 Thymolympathic deficiency and depression of cell-mediated immunity in protein-calorie malnutrition.  
1067 *Lancet*. 1971;2(7731):939-43.
- 1068 91. Whittle HC, Mee J, Werblinska J, Yakubu A, Onuora C, Gomwalk N. Immunity to measles in  
1069 malnourished children. *Clin Exp Immunol*. 1980;42(1):144-51.
- 1070 92. Ryon JJ, Moss WJ, Monze M, Griffin DE. Functional and Phenotypic Changes in Circulating  
1071 Lymphocytes from Hospitalized Zambian Children with Measles. *Clinical and Vaccine Immunology*.  
1072 2002;9(5):994-1003.
- 1073 93. Phillips RS, Enwonwu CO, Okolo S, Hassan A. Metabolic effects of acute measles in chronically  
1074 malnourished Nigerian children. *J Nutr Biochem*. 2004;15(5):281-8.
- 1075 94. Bono MR, Tejon G, Flores-Santibañez F, Fernandez D, Roseblatt M, Sauma D. Retinoic Acid as a  
1076 Modulator of T Cell Immunity. *Nutrients*. 2016;8(6):349.
- 1077 95. Caballero B, Rice A. Low serum retinol is associated with increased severity of measles in New  
1078 York City children. *Nutr Rev*. 1992;50(10):291-2.
- 1079 96. Semba RD. Vitamin A, immunity, and infection. *Clin Infect Dis*. 1994;19(3):489-99.
- 1080 97. Axton JH. Measles: a protein-losing enteropathy. *Br Med J*. 1975;3(5975):79-80.
- 1081 98. Dossetor JF, Whittle HC. Protein-losing enteropathy and malabsorption in acute measles  
1082 enteritis. *Br Med J*. 1975;2(5971):592-3.
- 1083 99. Larson LM, Guo J, Williams AM, Young MF, Ismaily S, Addo OY, et al. Approaches to Assess  
1084 Vitamin A Status in Settings of Inflammation: Biomarkers Reflecting Inflammation and Nutritional  
1085 Determinants of Anemia (BRINDA) Project. *Nutrients*. 2018;10(8).
- 1086 100. Huang Z, Liu Y, Qi G, Brand D, Zheng SG. Role of Vitamin A in the Immune System. *J Clin Med*.  
1087 2018;7(9).
- 1088 101. Victora CG, Christian P, Vidaletti LP, Gatica-Dominguez G, Menon P, Black RE. Revisiting  
1089 maternal and child undernutrition in low-income and middle-income countries: variable progress  
1090 towards an unfinished agenda. *Lancet*. 2021;397(10282):1388-99.
- 1091 102. Khara T, Mwangome M, Ngari M, Dolan C. Children concurrently wasted and stunted: A meta-  
1092 analysis of prevalence data of children 6-59 months from 84 countries. *Matern Child Nutr*.  
1093 2018;14(2):e12516.
- 1094 103. Ibrahim MK, Zambruni M, Melby CL, Melby PC. Impact of Childhood Malnutrition on Host  
1095 Defense and Infection. *Clin Microbiol Rev*. 2017;30(4):919-71.
- 1096 104. Walson JL, Berkley JA. The impact of malnutrition on childhood infections. *Curr Opin Infect Dis*.  
1097 2018;31(3):231-6.
- 1098 105. Krawinkel MB. Interaction of nutrition and infections globally: an overview. *Ann Nutr Metab*.  
1099 2012;61 Suppl 1:39-45.
- 1100 106. Millward DJ. Nutrition, infection and stunting: the roles of deficiencies of individual nutrients  
1101 and foods, and of inflammation, as determinants of reduced linear growth of children. *Nutr Res Rev*.  
1102 2017;30(1):50-72.
- 1103 107. Rytter MJ, Kolte L, Briend A, Friis H, Christensen VB. The immune system in children with  
1104 malnutrition--a systematic review. *PLoS One*. 2014;9(8):e105017.
- 1105 108. de Vries RD, de Swart RL. Measles immune suppression: functional impairment or numbers  
1106 game? *PLoS Pathog*. 2014;10(12):e1004482.

- 1107 109. Petrova VN, Sawatsky B, Han AX, Laksono BM, Walz L, Parker E, et al. Incomplete genetic  
1108 reconstitution of B cell pools contributes to prolonged immunosuppression after measles. *Sci Immunol.*  
1109 2019;4(41).
- 1110 110. Mina MJ, Kula T, Leng Y, Li M, de Vries RD, Knip M, et al. Measles virus infection diminishes  
1111 preexisting antibodies that offer protection from other pathogens. *Science.* 2019;366(6465):599-606.
- 1112 111. Enaud R, Prevel R, Ciarlo E, Beaufils F, Wieers G, Guery B, et al. The Gut-Lung Axis in Health and  
1113 Respiratory Diseases: A Place for Inter-Organ and Inter-Kingdom Crosstalks. *Front Cell Infect Microbiol.*  
1114 2020;10:9.
- 1115 112. Anand S, Mande SS. Diet, Microbiota and Gut-Lung Connection. *Front Microbiol.* 2018;9:2147.
- 1116 113. Dewey KG, Mayers DR. Early child growth: how do nutrition and infection interact? *Matern Child*  
1117 *Nutr.* 2011;7 Suppl 3(Suppl 3):129-42.
- 1118 114. El-Radhi AS. Fever in Common Infectious Diseases. *Clinical Manual of Fever in Children.* 2019:85-  
1119 140.
- 1120 115. World Health Organization. Guideline: Vitamin A supplementation in infants and children 6–59  
1121 months of age. 2011.
- 1122



## 1123 **Supporting information**

1124

1125 **S1 Table.** Characteristics of included studies on malnutrition and measles.

1126 **S2 Table.** Distribution of different malnutrition nomenclature across studies.

1127 **S3 Table.** Definitions of variables.

1128 **S4 Table.** Characteristics of vitamin A deficiency studies.

1129 **S5 Table.** Characteristics of vitamin A supplementation studies.

1130 **S6 Table.** Summary of methodological limitations in the existing evidence base.

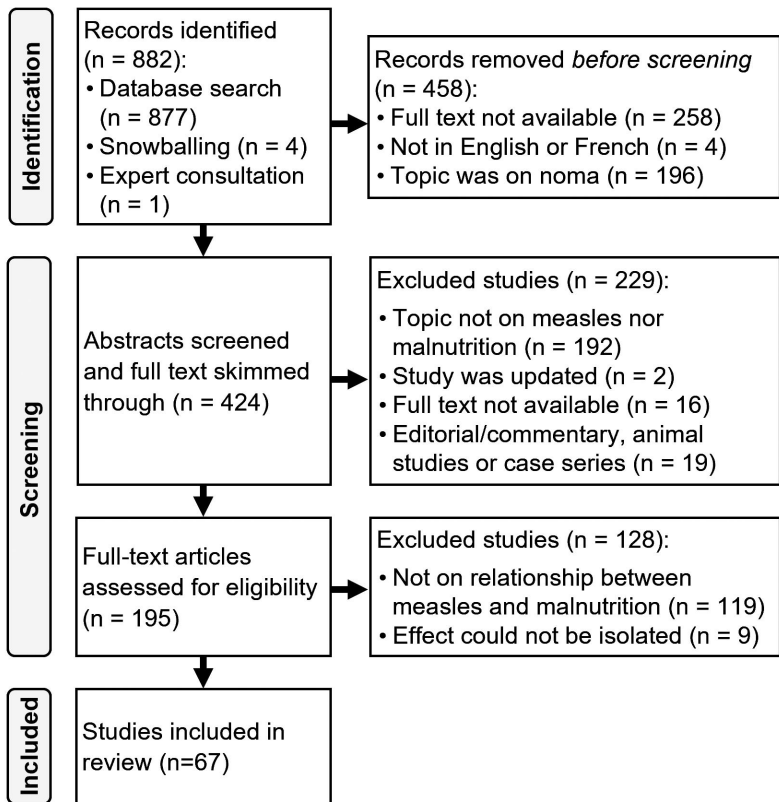

**Number of studies**

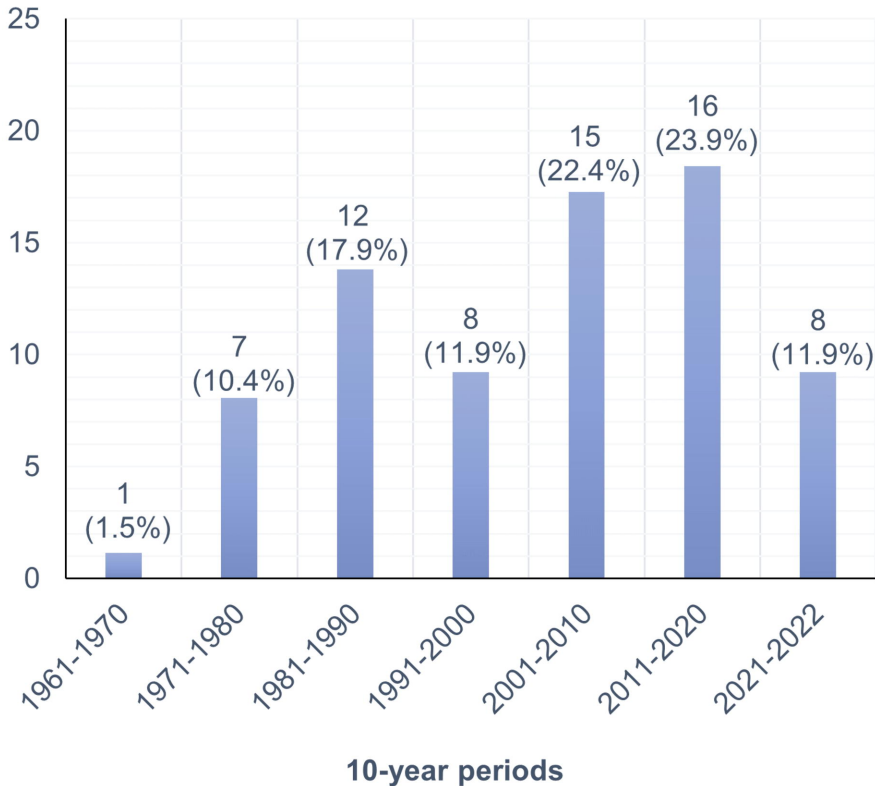

Source: https://medrxiv.org/content/10.1101/2023.01.21.23284872v1.full.pdf
